# Supplementary material
Source: Springer Nature journal article supplement (https://www.springermedizin.de/resource/supplementary/12974_2011_384_MOESM2_ESM.pdf/9601554)

## A: p-MK2

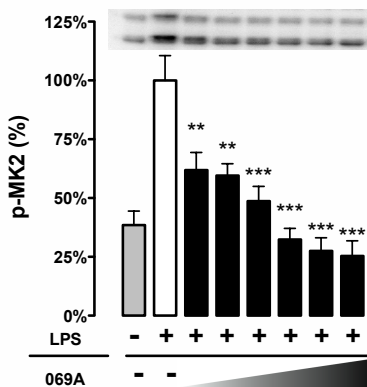

## B: p-MSK1

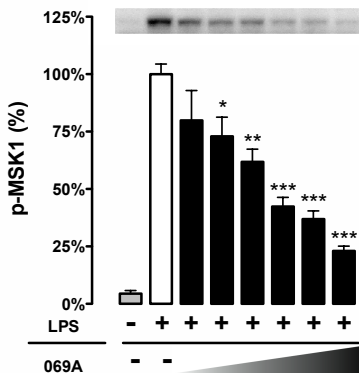

## C: p-CREB

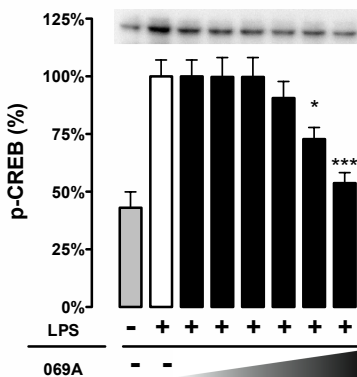

## D: p-ATF2

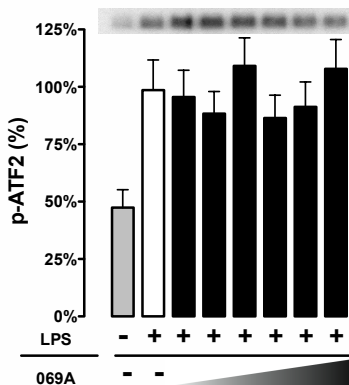

Supplement: MOESM2 [file 9601554]
